# Supplementary material
Source: PubMed Central journal article supplement (PMC5393208)
Supplement: pnas.1616418114.st01.pdf [file pnas.1616418114.st01.pdf]

**SopE**

| <b>Prot_<br/>accession</b> | <b>prot_description</b>                                                                 |
|----------------------------|-----------------------------------------------------------------------------------------|
| gi 545860373               | PREDICTED: myosin-10, partial [Sus scrofa]                                              |
| gi 417515715               | N-myosin-9 [Sus scrofa]                                                                 |
| gi 545860381               | PREDICTED: myosin-10-like, partial [Sus scrofa]                                         |
| gi 335303098               | PREDICTED: nck-associated protein 1 isoform 1 [Sus scrofa]                              |
| gi 545878347               | PREDICTED: cytoplasmic FMR1-interacting protein 2 [Sus scrofa]                          |
| gi 194038105               | PREDICTED: serine/threonine-protein kinase MRCK beta [Sus scrofa]                       |
| gi 456753034               | cytoplasmic FMR1 interacting protein 1 tv1 [Sus scrofa]                                 |
| gi 545859464               | PREDICTED: LOW QUALITY PROTEIN: ARF GTPase-activating protein GIT1 [Sus scrofa]         |
| gi 545857420               | PREDICTED: glial fibrillary acidic protein isoform X1 [Sus scrofa]                      |
| gi 545859459               | PREDICTED: unconventional myosin-XVIIIa-like [Sus scrofa]                               |
| gi 545804586               | PREDICTED: dynamin-1 isoform X6 [Sus scrofa]                                            |
| gi 311275636               | PREDICTED: septin-7 isoformX1 [Sus scrofa]                                              |
| gi 335305478               | PREDICTED: septin-7 isoform X2 [Sus scrofa]                                             |
| gi 545883210               | PREDICTED: septin-7 isoform X4 [Sus scrofa]                                             |
| gi 545855941               | PREDICTED: rho guanine nucleotide exchange factor 7-like isoform X1 [Sus scrofa]        |
| gi 545813220               | PREDICTED: actin-related protein 2/3 complex subunit 1A isoform X1 [Sus scrofa]         |
| gi 335285320               | PREDICTED: beta-adducin isoform 1 [Sus scrofa]                                          |
| gi 545849232               | PREDICTED: rho GTPase-activating protein 32-like [Sus scrofa]                           |
| gi 545856478               | PREDICTED: septin-9-like isoform X1 [Sus scrofa]                                        |
| gi 545824110               | PREDICTED: formin binding protein 1-like isoform X3 [Sus scrofa]                        |
| gi 545843739               | PREDICTED: alpha-adducin isoform X2 [Sus scrofa]                                        |
| gi 350592558               | PREDICTED: ARF GTPase-activating protein GIT2 isoformX1 [Sus scrofa]                    |
| gi 311262396               | PREDICTED: septin-11 isoform X1 [Sus scrofa]                                            |
| gi 1921                    | unnamed protein product [Sus scrofa]                                                    |
| gi 311276869               | PREDICTED: septin-6 isoformX2 [Sus scrofa]                                              |
| gi 311275507               | PREDICTED: neural Wiskott-Aldrich syndrome protein [Sus scrofa]                         |
| gi 545847676               | PREDICTED: serine/threonine-protein kinase PAK 1 [Sus scrofa]                           |
| gi 195562215               | actin-related protein 3-like protein [Sus scrofa]                                       |
| gi 311245370               | PREDICTED: coronin-2B [Sus scrofa]                                                      |
| gi 350589304               | PREDICTED: LOW QUALITY PROTEIN: serine/threonine-protein kinase MRCK alpha [Sus scrofa] |
| gi 545881737               | PREDICTED: actin-related protein 3B-like, partial [Sus scrofa]                          |
| gi 545886959               | PREDICTED: rho guanine nucleotide exchange factor 6 isoform X2 [Sus scrofa]             |
| gi 345090969               | septin 2 [Sus scrofa]                                                                   |
| gi 311253100               | PREDICTED: protein FAM49A isoform X1 [Sus scrofa]                                       |
| gi 194043462               | PREDICTED: septin-5 isoform 1 [Sus scrofa]                                              |
| gi 311271108               | PREDICTED: septin-5 isoform 2 [Sus scrofa]                                              |
| gi 311266870               | PREDICTED: cdc42 effector protein 4 isoform 1 [Sus scrofa]                              |
| gi 545817173               | PREDICTED: actin-related protein 2 isoform X1 [Sus scrofa]                              |
| gi 335289614               | PREDICTED: alpha-actinin-4 isoformX4 [Sus scrofa]                                       |
| gi 545812690               | PREDICTED: rho GTPase-activating protein 26 [Sus scrofa]                                |

|              |                                                                                                                                                                                                                                                           |
|--------------|-----------------------------------------------------------------------------------------------------------------------------------------------------------------------------------------------------------------------------------------------------------|
| gi 335289610 | PREDICTED: alpha-actinin-4 isoformX3 [Sus scrofa]                                                                                                                                                                                                         |
| gi 545799069 | PREDICTED: wiskott-Aldrich syndrome protein family member 1, partial [Sus scrofa]                                                                                                                                                                         |
| gi 545883669 | PREDICTED: drebrin-like protein isoform X2 [Sus scrofa]                                                                                                                                                                                                   |
| gi 346986437 | family with sequence similarity 49, member B [Sus scrofa]                                                                                                                                                                                                 |
| gi 545812233 | PREDICTED: septin-8 isoform X1 [Sus scrofa]                                                                                                                                                                                                               |
| gi 311267715 | PREDICTED: uncharacterized protein C17orf47-like isoformX1 [Sus scrofa]                                                                                                                                                                                   |
| gi 311270878 | PREDICTED: AP-1 complex subunit beta-1 isoformX3 [Sus scrofa]                                                                                                                                                                                             |
| gi 298160991 | actin-related protein 2/3 complex subunit 2 [Sus scrofa]                                                                                                                                                                                                  |
| gi 195562213 | actin-related protein 2-like protein [Sus scrofa]                                                                                                                                                                                                         |
| gi 545883672 | PREDICTED: drebrin-like protein isoform X3 [Sus scrofa]                                                                                                                                                                                                   |
| gi 545810084 | PREDICTED: cdc42-interacting protein 4 isoform X2 [Sus scrofa]                                                                                                                                                                                            |
| gi 187692583 | actin, partial [Sus scrofa]                                                                                                                                                                                                                               |
| gi 270000216 | F-actin capping protein beta subunit variant II [Sus scrofa]                                                                                                                                                                                              |
| gi 545894773 | PREDICTED: drebrin-like, partial [Sus scrofa]                                                                                                                                                                                                             |
| gi 545864956 | PREDICTED: adaptor-related protein complex 2, mu 1 subunit isoform X1 [Sus scrofa]                                                                                                                                                                        |
| gi 545825785 | PREDICTED: myosin light polypeptide 6 isoform X3 [Sus scrofa]                                                                                                                                                                                             |
| gi 194042010 | PREDICTED: gamma-adducin isoformX1 [Sus scrofa]                                                                                                                                                                                                           |
| gi 285818474 | HECT domain and ankyrin repeat containing, E3 ubiquitin protein ligase 1 [Sus scrofa]                                                                                                                                                                     |
| gi 545891694 | PREDICTED: LOW QUALITY PROTEIN: SH3-containing GRB2-like protein 3-interacting protein 1 [Sus scrofa]                                                                                                                                                     |
| gi 47606435  | RecName: Full=Myosin light polypeptide 6; AltName: Full=17 kDa myosin light chain; Short=LC17; AltName: Full=Myosin light chain 3; Short=MLC-3; AltName: Full=Myosin light chain alkali 3; Short=Myosin light chain A3; AltName: Full=Smooth muscle and n |
| gi 194043123 | PREDICTED: coronin-1C isoform X1 [Sus scrofa]                                                                                                                                                                                                             |
| gi 545854316 | PREDICTED: LOW QUALITY PROTEIN: wiskott-Aldrich syndrome protein family member 3 [Sus scrofa]                                                                                                                                                             |
| gi 545865888 | PREDICTED: hematopoietic lineage cell-specific protein [Sus scrofa]                                                                                                                                                                                       |
| gi 340007404 | alpha-actinin-1 [Sus scrofa]                                                                                                                                                                                                                              |
| gi 545882437 | PREDICTED: non-muscle caldesmon isoform X6 [Sus scrofa]                                                                                                                                                                                                   |
| gi 545894443 | PREDICTED: serine/threonine-protein kinase PAK 3-like, partial [Sus scrofa]                                                                                                                                                                               |
| gi 350595820 | PREDICTED: protein diaphanous homolog 2, partial [Sus scrofa]                                                                                                                                                                                             |
| gi 311267048 | PREDICTED: formin-like 1 isoform X1 [Sus scrofa]                                                                                                                                                                                                          |
| gi 195562233 | actin related protein 2/3 complex subunit 4 [Sus scrofa]                                                                                                                                                                                                  |
| gi 545883433 | PREDICTED: WAS/WASL-interacting protein family member 3 [Sus scrofa]                                                                                                                                                                                      |
| gi 194037165 | PREDICTED: neuronal-specific septin-3 isoform X1 [Sus scrofa]                                                                                                                                                                                             |
| gi 545866238 | PREDICTED: LOW QUALITY PROTEIN: transgelin 3, partial [Sus scrofa]                                                                                                                                                                                        |
| gi 545805746 | PREDICTED: src substrate cortactin [Sus scrofa]                                                                                                                                                                                                           |
| gi 545811085 | PREDICTED: calnexin isoform X1 [Sus scrofa]                                                                                                                                                                                                               |
| gi 335292694 | PREDICTED: heat shock-related 70 kDa protein 2 [Sus scrofa]                                                                                                                                                                                               |
| gi 343790912 | Ras-related C3 botulinum toxin substrate 1 (rho family, small GTP binding protein Rac1)                                                                                                                                                                   |
| gi 269994011 | Cell division control protein 42 [Sus scrofa]                                                                                                                                                                                                             |
| gi 350595730 | PREDICTED: oligophrenin-1, partial [Sus scrofa]                                                                                                                                                                                                           |

|              |                                                                                                                      |
|--------------|----------------------------------------------------------------------------------------------------------------------|
| gi 335288532 | PREDICTED: ubiquitin carboxyl-terminal hydrolase 5 isoform 1 [Sus scrofa]                                            |
| gi 545858175 | PREDICTED: WAS/WASL-interacting protein family member 2 isoform X1 [Sus scrofa]                                      |
| gi 121118    | RecName: Full=Gelsolin; AltName: Full=Actin-depolymerizing factor; Short=ADF; AltName: Full=Brevin; Flags: Precursor |
| gi 545874335 | PREDICTED: formin-like 2 isoform X1 [Sus scrofa]                                                                     |
| gi 545815773 | PREDICTED: septin-10-like isoform X1 [Sus scrofa]                                                                    |
| gi 311259003 | PREDICTED: myosin regulatory light chain 12B isoform 1 [Sus scrofa]                                                  |
| gi 116850    | RecName: Full=Cofilin-1; AltName: Full=Cofilin, non-muscle isoform                                                   |
| gi 545803797 | PREDICTED: coronin-2A [Sus scrofa]                                                                                   |
| gi 194034716 | PREDICTED: tropomodulin-2 isoform X1 [Sus scrofa]                                                                    |
| gi 545849230 | PREDICTED: rho GTPase-activating protein 32-like, partial [Sus scrofa]                                               |
| gi 545853691 | PREDICTED: abl interactor 1-like [Sus scrofa]                                                                        |
| gi 545877574 | PREDICTED: LOW QUALITY PROTEIN: actin, beta-like 2 [Sus scrofa]                                                      |
| gi 350580558 | PREDICTED: dynamin-2 [Sus scrofa]                                                                                    |
| gi 417515832 | AP-2 complex subunit alpha-2 isoform 1 [Sus scrofa]                                                                  |
| gi 311245964 | PREDICTED: protein KIAA1045 homolog isoform X1 [Sus scrofa]                                                          |
| gi 545894715 | PREDICTED: drebrin-like, partial [Sus scrofa]                                                                        |
| gi 147223313 | GNAS complex locus [Sus scrofa]                                                                                      |
| gi 545804423 | PREDICTED: actin related protein 2/3 complex subunit 5-like protein isoform X1 [Sus scrofa]                          |
| gi 545849271 | PREDICTED: rho GTPase-activating protein 32-like [Sus scrofa]                                                        |
| gi 118627572 | F-actin capping protein subunit alpha 1 [Sus scrofa]                                                                 |
| gi 545865526 | PREDICTED: serine/threonine-protein kinase PAK 2, partial [Sus scrofa]                                               |
| gi 194042094 | PREDICTED: shootin-1 isoformX1 [Sus scrofa]                                                                          |
| gi 335302838 | PREDICTED: ermin [Sus scrofa]                                                                                        |
| gi 264748    | myosin regulatory light chain, LC20 [swine, aorta smooth muscle, Peptide, 171 aa]                                    |
| gi 545894844 | PREDICTED: serine/threonine-protein kinase PAK 3-like [Sus scrofa]                                                   |
| gi 350582722 | PREDICTED: 14-3-3 protein theta isoform 1 [Sus scrofa]                                                               |
| gi 545832244 | PREDICTED: myosin-14 [Sus scrofa]                                                                                    |
| gi 545845694 | PREDICTED: LOW QUALITY PROTEIN: Rho GTPase activating protein 10 [Sus scrofa]                                        |
| gi 545875342 | PREDICTED: LOW QUALITY PROTEIN: ras-associated and pleckstrin homology domains-containing protein 1 [Sus scrofa]     |
| gi 311257986 | PREDICTED: TBC1 domain family member 17 isoform 1 [Sus scrofa]                                                       |
| gi 88861940  | vascular smooth muscle alpha-actin, partial [Sus scrofa]                                                             |
| gi 545867935 | PREDICTED: dematin isoform X1 [Sus scrofa]                                                                           |
| gi 545832250 | PREDICTED: myosin-14-like [Sus scrofa]                                                                               |
| gi 350589554 | PREDICTED: abl interactor 1 [Sus scrofa]                                                                             |
| gi 195562227 | actin related protein 2/3 complex subunit 3 [Sus scrofa]                                                             |
| gi 545825252 | PREDICTED: keratin, type II cytoskeletal 6A-like isoform X3 [Sus scrofa]                                             |
| gi 311258550 | PREDICTED: EF-hand domain-containing protein D2 [Sus scrofa]                                                         |
| gi 456753031 | DEAD (Asp-Glu-Ala-Asp) box helicase 1 [Sus scrofa]                                                                   |
| gi 34978340  | RecName: Full=cAMP-dependent protein kinase catalytic subunit alpha; Short=PKA C-alpha                               |
| gi 354549870 | coronin 1A [Sus scrofa]                                                                                              |

|              |                                                                                                                                            |
|--------------|--------------------------------------------------------------------------------------------------------------------------------------------|
| gi 545885788 | PREDICTED: protein diaphanous homolog 2-like, partial [Sus scrofa]                                                                         |
| gi 82465299  | filamin-A, partial [Sus scrofa]                                                                                                            |
| gi 350593795 | PREDICTED: abl interactor 2-like, partial [Sus scrofa]                                                                                     |
| gi 545826750 | PREDICTED: FYVE, RhoGEF and PH domain-containing protein 4-like [Sus scrofa]                                                               |
| gi 311259825 | PREDICTED: leucine-rich repeat-containing protein 16A isoform X1 [Sus scrofa]                                                              |
| gi 545884624 | PREDICTED: LOW QUALITY PROTEIN: ubiquitin-like modifier activating enzyme 1 [Sus scrofa]                                                   |
| gi 545848571 | PREDICTED: neural cell adhesion molecule 1 isoform X1 [Sus scrofa]                                                                         |
| gi 2061      | plasma membrane Ca <sup>2+</sup> pump (PMCA1b) [Sus scrofa]                                                                                |
| gi 350579892 | PREDICTED: coronin-1B [Sus scrofa]                                                                                                         |
| gi 335282227 | PREDICTED: switch-associated protein 70 [Sus scrofa]                                                                                       |
| gi 311244946 | PREDICTED: inositol-trisphosphate 3-kinase A [Sus scrofa]                                                                                  |
| gi 545815512 | PREDICTED: caskin-1-like isoform X1 [Sus scrofa]                                                                                           |
| gi 335290150 | PREDICTED: protein kinase C gamma type isoform X1 [Sus scrofa]                                                                             |
| gi 1947086   | inositol(1,3,4,5)tetrakisphosphate receptor [Sus scrofa]                                                                                   |
| gi 545835431 | PREDICTED: microtubule-associated protein RP/EB family member 2 [Sus scrofa]                                                               |
| gi 61676044  | fatty acid synthase, partial [Sus scrofa]                                                                                                  |
| gi 311248936 | PREDICTED: phenylalanine--tRNA ligase alpha subunit isoform X1 [Sus scrofa]                                                                |
| gi 545894385 | PREDICTED: myosin-11-like, partial [Sus scrofa]                                                                                            |
| gi 335297873 | PREDICTED: neurabin-2 [Sus scrofa]                                                                                                         |
| gi 8745552   | voltage-dependent anion channel 1 [Sus scrofa]                                                                                             |
| gi 545863553 | PREDICTED: probable protein BRICK1-like isoform 1 [Sus scrofa]                                                                             |
| gi 545859967 | PREDICTED: misshapen-like kinase 1 isoform X2 [Sus scrofa]                                                                                 |
| gi 346986408 | excitatory amino acid transporter 1 isoform 1 [Sus scrofa]                                                                                 |
| gi 117660874 | MLC1f [Sus scrofa]                                                                                                                         |
| gi 194037529 | PREDICTED: myosin light chain 6B [Sus scrofa]                                                                                              |
| gi 545854523 | PREDICTED: LOW QUALITY PROTEIN: stAR-related lipid transfer protein 13 [Sus scrofa]                                                        |
| gi 195562237 | actin related protein 2/3 complex subunit 5 [Sus scrofa]                                                                                   |
| gi 194035831 | PREDICTED: coatomer subunit alpha isoform 2 [Sus scrofa]                                                                                   |
| gi 545873581 | PREDICTED: kelch repeat and BTB domain-containing protein 11 isoform X1 [Sus scrofa]                                                       |
| gi 115394756 | PR33A [Sus scrofa]                                                                                                                         |
| gi 350583824 | PREDICTED: cdc42 effector protein 1 [Sus scrofa]                                                                                           |
| gi 545834964 | PREDICTED: polyadenylate-binding protein 4 isoform X3 [Sus scrofa]                                                                         |
| gi 385862190 | WAS protein family, member 2 [Sus scrofa]                                                                                                  |
| gi 545835593 | PREDICTED: nexilin-like, partial [Sus scrofa]                                                                                              |
| gi 37999870  | RecName: Full=Myosin-11; AltName: Full=Myosin heavy chain 11; AltName: Full=Myosin heavy chain, smooth muscle isoform; AltName: Full=SMMHC |
| gi 545864194 | PREDICTED: coatomer subunit beta~ [Sus scrofa]                                                                                             |
| gi 545862959 | PREDICTED: filamin-B-like [Sus scrofa]                                                                                                     |
| gi 86450155  | EPLIN-b [Sus scrofa]                                                                                                                       |
| gi 545824437 | PREDICTED: ataxin-10 [Sus scrofa]                                                                                                          |

|              |                                                                                 |
|--------------|---------------------------------------------------------------------------------|
| gi 226256    | peptidyl-Pro cis trans isomerase                                                |
| gi 350583632 | PREDICTED: calponin-3 [Sus scrofa]                                              |
| gi 1960      | h1-calponin [Sus scrofa]                                                        |
| gi 335293556 | PREDICTED: exocyst complex component 1 isoform X1 [Sus scrofa]                  |
| gi 194041975 | PREDICTED: STE20-like kinase isoformX2 [Sus scrofa]                             |
| gi 545893381 | PREDICTED: LOW QUALITY PROTEIN: coronin-1A, partial [Sus scrofa]                |
| gi 335309813 | PREDICTED: coactosin-like protein-like, partial [Sus scrofa]                    |
| gi 545863871 | PREDICTED: coatomer subunit gamma-1 [Sus scrofa]                                |
| gi 545822572 | PREDICTED: rho guanine nucleotide exchange factor 11 [Sus scrofa]               |
| gi 350580161 | PREDICTED: excitatory amino acid transporter 2 isoformX2 [Sus scrofa]           |
| gi 335287646 | PREDICTED: MICAL-like protein 1-like isoform X1 [Sus scrofa]                    |
| gi 194038051 | PREDICTED: nuclear pore complex protein Nup153 isoform X1 [Sus scrofa]          |
| gi 194040262 | PREDICTED: ras-related protein Rab-23 [Sus scrofa]                              |
| gi 359465556 | active breakpoint cluster region-related protein [Sus scrofa]                   |
| gi 3288632   | unnamed protein product [Sus scrofa]                                            |
| gi 311260245 | PREDICTED: ras/Rap GTPase-activating protein SynGAP [Sus scrofa]                |
| gi 545865891 | PREDICTED: golgin subfamily B member 1 [Sus scrofa]                             |
| gi 545854276 | PREDICTED: saccin [Sus scrofa]                                                  |
| gi 545829295 | PREDICTED: alanine--tRNA ligase, cytoplasmic isoform X1 [Sus scrofa]            |
| gi 311275457 | PREDICTED: filamin-C isoformX1 [Sus scrofa]                                     |
| gi 343488534 | homeobox prox 1 [Sus scrofa]                                                    |
| gi 335296573 | PREDICTED: LIM zinc-binding domain-containing Nebulette isoformX2 [Sus scrofa]  |
| gi 545843361 | PREDICTED: cytoplasmic dynein 1 heavy chain 1-like [Sus scrofa]                 |
| gi 350586109 | PREDICTED: adenylate kinase isoenzyme 5 isoform X1 [Sus scrofa]                 |
| gi 456753006 | exocyst complex component 4 tv1 [Sus scrofa]                                    |
| gi 545847373 | PREDICTED: nuclear mitotic apparatus protein 1 isoform X1 [Sus scrofa]          |
| gi 545878901 | PREDICTED: ankyrin-1 [Sus scrofa]                                               |
| gi 545849855 | PREDICTED: cytoplasmic dynein 1 intermediate chain 1-like, partial [Sus scrofa] |
| gi 350588987 | PREDICTED: protein PRRC2C isoform X1 [Sus scrofa]                               |
| gi 122888765 | cyclin-dependent kinase 5 [Sus scrofa]                                          |
| gi 194041443 | PREDICTED: phytanoyl-CoA hydroxylase-interacting protein [Sus scrofa]           |
| gi 311277122 | PREDICTED: myotubularin-related protein 1 isoform X1 [Sus scrofa]               |
| gi 8745554   | voltage-dependent anion channel 2 [Sus scrofa]                                  |
| gi 545858751 | PREDICTED: collagen alpha-1(I) chain-like [Sus scrofa]                          |
| gi 335294978 | PREDICTED: coatomer subunit delta isoform 1 [Sus scrofa]                        |
| gi 545880931 | PREDICTED: LOW QUALITY PROTEIN: solute carrier family 12 member 5 [Sus scrofa]  |
| gi 417515802 | dedicator of cytokinesis protein 1 [Sus scrofa]                                 |
| gi 545884076 | PREDICTED: FERM and PDZ domain-containing protein 4 isoform X1 [Sus scrofa]     |
| gi 545894657 | PREDICTED: kinesin-like protein KIF7-like, partial [Sus scrofa]                 |
| gi 545799363 | PREDICTED: SH3 domain-binding glutamic acid-rich-like protein 2 [Sus scrofa]    |
| gi 545845696 | PREDICTED: rho GTPase-activating protein 10-like [Sus scrofa]                   |
| gi 84042928  | paralemmin-1 [Sus scrofa]                                                       |

|              |                                                                                                      |
|--------------|------------------------------------------------------------------------------------------------------|
| gi 545885782 | PREDICTED: uncharacterized protein LOC100739034 [Sus scrofa]                                         |
| gi 545844158 | PREDICTED: LOW QUALITY PROTEIN: family with sequence similarity 184, member B [Sus scrofa]           |
| gi 194042067 | PREDICTED: actin-binding LIM protein 1 isoformX1 [Sus scrofa]                                        |
| gi 311250135 | PREDICTED: kinesin family member 3A isoformX1 [Sus scrofa]                                           |
| gi 350588131 | PREDICTED: tripartite motif-containing protein 3 [Sus scrofa]                                        |
| gi 224555775 | tropomodulin 1, partial [Sus scrofa]                                                                 |
| gi 545798021 | PREDICTED: tumor protein D53 isoform X1 [Sus scrofa]                                                 |
| gi 46909483  | monoamine oxidase B [Sus scrofa]                                                                     |
| gi 531146    | myosin, partial [Sus scrofa]                                                                         |
| gi 545894239 | PREDICTED: lanC-like protein 2-like [Sus scrofa]                                                     |
| gi 545804815 | PREDICTED: protein PRRC2B isoform X5 [Sus scrofa]                                                    |
| gi 335283572 | PREDICTED: transcriptional activator protein Pur-alpha isoformX1 [Sus scrofa]                        |
| gi 311267056 | PREDICTED: 1-phosphatidylinositol 4,5-bisphosphate phosphodiesterase delta-3 isoform X1 [Sus scrofa] |
| gi 335293678 | PREDICTED: ras GTPase-activating protein-binding protein 2 isoformX1 [Sus scrofa]                    |
| gi 345441801 | TNF receptor-associated protein 1 [Sus scrofa]                                                       |
| gi 545843929 | PREDICTED: actin-binding LIM protein 2-like isoform X1 [Sus scrofa]                                  |
| gi 545884243 | PREDICTED: cyclin-dependent kinase-like 5 isoform X1 [Sus scrofa]                                    |
| gi 346986241 | neurocalcin delta [Sus scrofa]                                                                       |
| gi 545859588 | PREDICTED: unconventional myosin-Ic [Sus scrofa]                                                     |
| gi 545860458 | PREDICTED: LOW QUALITY PROTEIN: myosin-13-like [Sus scrofa]                                          |
| gi 350589564 | PREDICTED: myosin-IIIa [Sus scrofa]                                                                  |
| gi 516155    | Unconventional myosin [Sus scrofa] - Myosin VI                                                       |
